# Supplementary material
Source: MDPI journal article supplement (https://www.mdpi.com/2076-3417/10/16/5549)
Supplement: s1 [file s1]

Supplementary materials

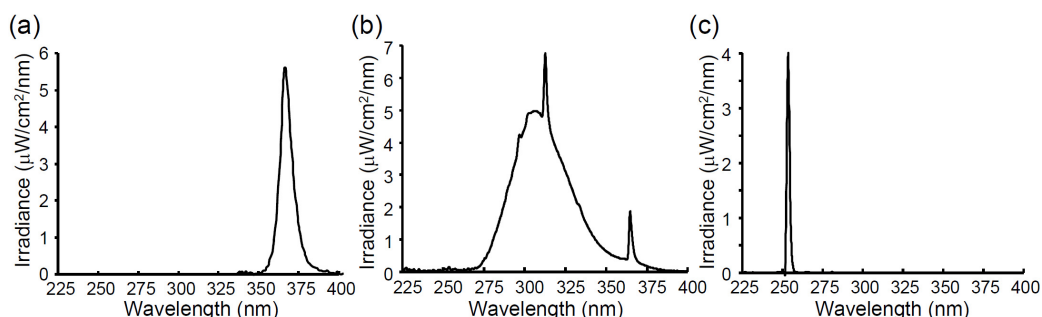

**Figure S1.** Emission spectra of various UV lamps. (a) UVA-LED (b) UVB lamp (c) UVC lamp.

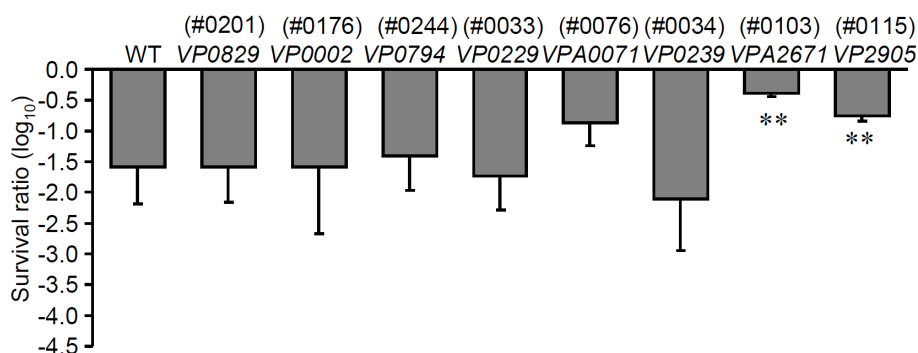

**Figure S2.** Sensitivities of mutants from first-round selection to UVA-LED (see Figure 1). Sensitivities of the six mutants with high UVA sensitivity are shown in Figure 3a. Sensitivity to UV irradiation is presented as  $\log_{10}$  of the survival ratio as described in the Materials and Methods section. Values are shown as means  $\pm$  standard deviation (SD;  $n = 3 - 6$ , with  $n =$  number of independent experimental replicates).  $**P < 0.01$  versus WT.

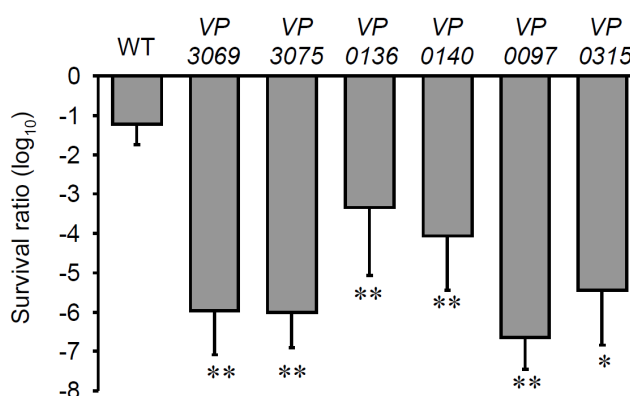

**Figure S3.** Sensitivities to hydrogen peroxide in highly UVA-sensitive *V. parahaemolyticus* mutants. The sensitivities to hydrogen peroxide is presented as  $\log_{10}$  of the survival ratio as described as previous report [Le TT, et al. *Biochim. Biophys. Acta.* **2012**, 1820, 1686-1692. doi: 10.1016/j.bbagen.2012.06.019]. Values are shown as means  $\pm$  standard deviation (SD;  $n = 3-6$ ,  $n =$  number of independent replicates).  $*P < 0.05$  or  $**P < 0.01$  versus WT.
